# Supplementary material for: Ultrathin metal−organic layers/carbon nitride nanosheet composites as 2D/2D heterojunctions for efficient CO2 photoreduction
Source: Royal Society of Chemistry journal article supplement (doi:10.1039/d2ta09579c), 2023-01-01
Supplement: d2ta09579c1.pdf [file d2ta09579c1.pdf]

## **Ultrathin metal–organic layers/carbon nitride nanosheet composites as 2D/2D heterojunctions for efficient CO<sub>2</sub> photoreduction**

Wei Yang,<sup>a,b,†</sup> Xiao Lin,<sup>a,†</sup> Wen-Jie Shi,<sup>a,†</sup> Ji-Hong Zhang,<sup>a</sup> Yu-Chen Wang,<sup>a</sup> Ji-Hua Deng,<sup>a,\*</sup>  
Di-Chang Zhong<sup>a,\*</sup> and Tong-Bu Lu<sup>a,\*</sup>

<sup>a</sup> *Institute for New Energy Materials & Low Carbon Technologies, School of Material Science & Engineering, School of Chemistry & Chemical Engineering, Tianjin University of Technology, Tianjin 300384, China*

<sup>b</sup> *Institute of Coal Chemistry, State Key Laboratory of Coal Conversion, Chinese Academy of Sciences, Taiyuan 030001, China*

<sup>†</sup> These authors contributed equally to this work.

\* Corresponding authors:

E-mail: [djhycu\\_2006@aliyun.com](mailto:djhycu_2006@aliyun.com) (J. H. Deng);

E-mail: [dczhong@email.tjut.edu.cn](mailto:dczhong@email.tjut.edu.cn) (D. C. Zhong);

E-mail: [lutongbu@tjut.edu.cn](mailto:lutongbu@tjut.edu.cn) (T. B. Lu).

|                                                         |   |
|---------------------------------------------------------|---|
| 1. Materials and methods .....                          | 3 |
| 2. Photocatalytic CO <sub>2</sub> reduction test. ....  | 5 |
| 3. Electrochemical and photoelectrochemical tests ..... | 6 |
| 4. ESI tables and figures .....                         | 7 |

# 1. Materials and methods

## 1.1 Materials

All chemicals and materials were commercially obtained and used without any further purification. Nafion solution (5 wt%) was purchased from Alfa Aesar. All solutions used in electrochemical experiments were prepared with Millipore water (18.2 MΩ). The purity of Argon is 99.999%.

## 1.2 Preparation

### *Synthesis of Co-MOF*

Bulk Co-MOF was prepared by the hydrothermal method.<sup>[1]</sup> H<sub>2</sub>BDC (24.9 mg, 0.15 mmol) and Co(NO<sub>3</sub>)<sub>2</sub>·H<sub>2</sub>O (43.7 mg, 0.15 mmol) were dissolved in 7.2 mL DMF/H<sub>2</sub>O/ethanol (16:1:1) mixed solution under ultrasonication. Then the mixed solution was transferred into a 20 mL Teflon-lined stainless-steel autoclave and heated at 140 °C for 48 h. After cooling down to the room temperature, the received product was collected via filtration and washed with H<sub>2</sub>O and EtOH by several times. The final product was dried at 50 °C in a vacuum oven for 12 h.

### *Synthesis of Co-MOF/CN(400) nanocomposites*

g-C<sub>3</sub>N<sub>4</sub> powder (400 mg) and Co(NO<sub>3</sub>)<sub>2</sub>·H<sub>2</sub>O (43.7 mg, 0.15 mmol) were dispersed in 7.2 mL DMF/H<sub>2</sub>O/ethanol (16:1:1) mixed solvent with ultrasonication for 1h. 0.15 mmol H<sub>2</sub>BDC was dissolved in the solution and stirred for 0.5 h. Afterward, we transferred the mixed solution into a 20 mL Teflon-lined stainless-steel autoclave and heated it at 140 °C for 48 h. The received product was collected via filtration and washed with H<sub>2</sub>O and EtOH by several times. The final product was dried at 50 °C in a vacuum oven for 12 h.

### *Synthesis of Fe-MOL/CN(400), Ni-MOL/CN(400), and Cu-MOL/CN(400) nanocomposites*

The Fe-MOL/CN(400), Ni-MOL/CN(400), and Cu-MOL/CN(400) nanocomposites were prepared with a similar procedure to Co-MOL/CN(400) except using other metal salts instead of Co(NO<sub>3</sub>)<sub>2</sub>·H<sub>2</sub>O.

## 1.3 Methods

The X-ray powder diffraction (XRD) of all the materials were recorded on a Smart X-ray diffractometer (SmartLab 9 KW, Rigaku, Japan) equipped with graphite monochromatized with Cu Kα source (radiation) (λ = 1.54178 Å). Fourier transform infrared (FT-IR) spectra were recorded on a Perkin Elmer Frontier Mid-IR FTIR spectrometer in the 400-4000 cm<sup>-1</sup> region with KBr pellets. A CO<sub>2</sub> sorption test was performed on a multi-station specific surface micropore, and vapor adsorption analyzer (BELSORP-Mas, MicrotracBEL, Japan) at 298 K. X-ray photoelectron spectra (XPS) were conducted on ESCA LAB 250 Xi spectrometer (Thermo Scientific, USA) with Al Kα as the excitation source. The solid-state UV-Vis absorption spectrum was obtained by a UV-vis spectrophotometer (UV-3600, Shimadzu, Japan). Scanning electron microscope (SEM) images were recorded on a Verios 460 L Ultrahigh Resolution Scanning Electron Microscope. The transmission electron microscopy (TEM) was carried out using a Tecnai G2 Spirit TWIN at an acceleration voltage of 120 KV. HAADF images and Energy-dispersive X-ray spectroscopy (EDS) were taken using High-Resolution Transmission Electron Microscope EFG (Talos F200 X, FEI, USA). Atomic force microscopy (AFM) images were recorded on a Bruker Icon (America) scanning probe microscope in tapping mode in the air. The metal (Co) contents in prepared catalysts were measured by inductively coupled plasma-atomic emission spectroscopy (ICP-AES, SPECTRO BLUE). Electrochemical measurements were carried out on a CHI 670E electrochemical workstation. The photoluminescence (PL) spectra were conducted on a fluorescence spectrophotometer (F-7000, Hitachi, Japan), and the experimental data were analyzed by the SymPhoTime 64. Time-resolved fluorescence (TRF) spectra were tested by another fluorescence spectrophotometer (Horiba FL-3, HORIBA Scientific, USA). The isotopic labeling experiment was conducted under a <sup>13</sup>CO<sub>2</sub> atmosphere, and the gas products were analyzed by a quantitative mass spectrometer (HPR-20 Q/C Benchtop

Gas Analysis System). The evolved CO and H<sub>2</sub> were monitored using an Agilent 7820A gas chromatography equipped with two automated gas sampling valves containing a thermal conductivity detector (TCD) and a flame ionization detector (FID).

**AFM Measurements.** 0.5 mg of Co-MOLs or Co-MOLs/CN was dispersed in 1 mL ethanol, followed by ultrasonication (40 KHz) for 1 h, resulting in a suspension, which was then dropped (~20  $\mu$ L) onto a clean mica sheet. The supported sample was dried at room temperature for 4 h and used for AFM measurements.

**ICP-MS Measurements.** 1 mg of Co-MOLs/CN(x) was suspended in nitric acid (14.4 M, 5 mL, GR). The mixture was ultrasonicated continuously for 2–3 min to form a uniform suspension. The suspension was subjected to microwave treatment at 80 °C for 20 min. After that, the mixture was centrifuged at 10000 rpm. 250  $\mu$ L of the supernatant was diluted to 10 mL by adding deionized water. Three parallel measurements were carried out for each sample, and average value was reported.

**CO<sub>2</sub> Sorption.** CO<sub>2</sub> sorption measurements for CN, Co-MOF, Co-MOL, or Co-MOF/CN(400) or Co-MOL/CN(400) were performed on a BELSORP-max automatic volumetric adsorption apparatus. The constant temperature of 298 K were controlled by circulating water bath. The adsorption isotherms were collected in a relative pressure range from 10<sup>-4</sup> to 1.0 atm. The initial outgassing process for all samples was carried out under a high vacuum (less than 10<sup>-6</sup> mbar) at 120 °C for 10 h. The degassed sample and sample tubes were weighed precisely and transferred to the analyser.

## 2. Photocatalytic CO<sub>2</sub> reduction test

The photocatalytic CO<sub>2</sub> reduction experiments were performed on a 17 mL reactor containing the catalyst, 2,2'-dipyridine, 3 mL of DI-water, 1 mL CH<sub>3</sub>CN and 1 mL TEOA at ambient temperature and atmospheric pressure. After the reaction system was purged with CO<sub>2</sub> for 30 min, the photocatalytic reaction was initiated by irradiation under a Xe lamp with a UV-cutoff filter (300 mW,  $\lambda \geq 420$  nm). A gas chromatography analyzed the generated gases in the headspace. Each photocatalytic reaction was repeated at least three times to confirm the reliability of the data. Recycling experiments were carried out under similar conditions using the collected catalyst after the photocatalytic test instead of fresh motivation.

## 3. Electrochemical and photoelectrochemical tests

All electrochemical measurements were conducted in an airtight cell using a CHI 670E Potentiostat with a three-electrode configuration. Platinum foil and an Ag/AgCl (3 M KCl) electrode were used as counter and reference electrodes, respectively. To prepare the working electrode, 5 mg of the catalyst was dispersed in ethanol solvent (1 mL) with 50  $\mu$ L Nafion solution (5 wt% in water). Then, the suspension was ultrasonicated for 30 min to generate a homogeneous ink. Next, the catalyst ink (100  $\mu$ L) was drop-casted onto the FTO glass with a size of 0.5 cm $\times$ 2.0 cm with a 0.25 mg cm<sup>-2</sup> loading for catalysts and painted onto the FTO glass with 0.5 cm $\times$ 1 cm was used as the working electrode.

The electrolyte was a 0.2 M Na<sub>2</sub>SO<sub>4</sub> aqueous solution saturated with Ar (pH ~7.2). Before the tests, the electrolyte was purged with Ar for at least 20 min. The Mott-Schottky curves were taken at potential ranging from -1.2 to 0.2 V (vs. Ag/AgCl) under the dark condition with different frequencies. Electrochemical impedance spectroscopy (EIS) plots were performed at potential -0.9 V vs. Ag/AgCl, with the frequency ranging from 100 kHz to 0.1 Hz and the modulation amplitude of 5 mV. The transient photocurrent measurements (TPC) were recorded at an applied potential of 0 V vs. Ag/AgCl under the visible light illumination ( $\lambda \geq 420$  nm).

#### 4. ESI tables and figures

**Table S1** The percentage of Co measured by inductively coupled plasma-mass spectroscopy for different catalysts.

| Materials      | Co content wt% |
|----------------|----------------|
| Co-MOL         | 37.2057        |
| Co-MOL/CN(100) | 7.8801         |
| Co-MOL/CN(200) | 4.0059         |
| Co-MOL/CN(300) | 3.0941         |
| Co-MOL/CN(400) | 2.3633         |
| Co-MOL/CN(500) | 1.7032         |
| Co-MOL/CN(600) | 1.2775         |
| Co-MOL/CN(800) | 0.7535         |
| CN             | 0              |

**Table S2** Comparison of reported MOF-based catalysts for photocatalytic CO<sub>2</sub> reduction.

| Entry | Photocatalyst                            | Solvent                                                                    | Light source                                   | Main Products<br>( $\mu\text{mol}\cdot\text{g}^{-1}\cdot\text{h}^{-1}$ ) | Refs.            |
|-------|------------------------------------------|----------------------------------------------------------------------------|------------------------------------------------|--------------------------------------------------------------------------|------------------|
| 1     | UiO-66/CNNS                              | MeCN/TEOA = 4:1                                                            | 300 W Xe-lamp<br>$\lambda \geq 420 \text{ nm}$ | CO (9.9)                                                                 | [2]              |
| 2     | BIF-20@ g-C <sub>3</sub> N <sub>4</sub>  | MeCN/TEOA = 4:1                                                            | 300 W Xe-lamp                                  | CO (53.9)<br>CH <sub>4</sub> (15.5)                                      | [3]              |
| 3     | NUZ/HGN-35%                              | TEOA/H <sub>2</sub> O = 20:1                                               | 300 W Xe-lamp                                  | CO (31.6)                                                                | [4]              |
| 4     | 4NiMOF/CN-AA                             | H <sub>2</sub> O                                                           | 300 W Xe-lamp<br>$\lambda \geq 420 \text{ nm}$ | CO+CH <sub>4</sub> (54.5)                                                | [5]              |
| 5     | TiO–CN                                   | MeCN/TEOA/H <sub>2</sub> O =<br>3:1:1                                      | 300 W Xe lamp<br>$\lambda \geq 420 \text{ nm}$ | CO (283.9)                                                               | [6]              |
| 6     | Co-ZIF-9/g-C <sub>3</sub> N <sub>4</sub> | MeCN/TEOA/H <sub>2</sub> O =<br>3:2:1                                      | 300 W Xe lamp<br>$\lambda \geq 420 \text{ nm}$ | CO (10.4)                                                                | [7]              |
| 7     | g-C <sub>3</sub> N <sub>4</sub> -MOLs-30 | MeCN/TEOA/H <sub>2</sub> O =<br>3:1:1                                      | 300 W Xe lamp<br>$\lambda \geq 420 \text{ nm}$ | CO (464.1)                                                               | [8]              |
| 8     | TCNZ8                                    | H <sub>2</sub> SO <sub>4</sub> (0.3 mL, 2 M)<br>NaHCO <sub>3</sub> (84 mg) | 300 W Xe lamp                                  | CH <sub>3</sub> OH (0.75)                                                | [9]              |
| 9     | CoMOL/CN(400)                            | MeCN/TEOA/H <sub>2</sub> O =<br>3:1:1                                      | 300 W Xe lamp<br>$\lambda \geq 420 \text{ nm}$ | CO (539.1)                                                               | <b>This Work</b> |

**Table S3** Multiexponential fit parameters for the decay of photoluminescence lifetime (Excitation wavelength: 365 nm; Detection wavelength: 545 nm).

|           | $\tau_1$ | $\tau_2$ | $\tau_3$ | Average lifetime $\langle \tau_{\text{ave}} \rangle$ (ns) |
|-----------|----------|----------|----------|-----------------------------------------------------------|
| CN        | 1.11     | 1.11     | 4.58     | 1.96                                                      |
| A         | 47.78    | 27.60    | 24.62    |                                                           |
| CN/ FLNMF | 1.03     | 1.03     | 4.09     | 1.83                                                      |
| A         | 44.21    | 29.47    | 26.32    |                                                           |

An  $A_1 + A_2 + A_3 = 1$ ; The calculation formula of average lifetime  $\tau_{\text{Ave}} = \sum \tau_i * A_i$ .

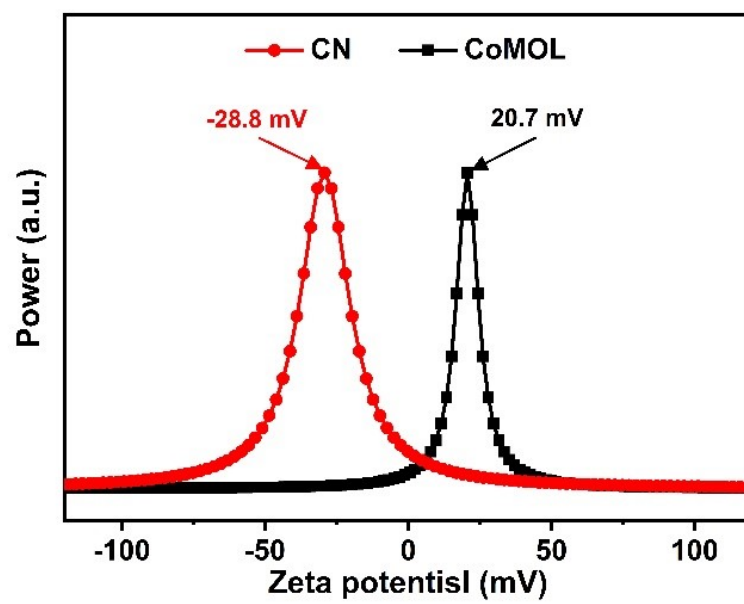

**Fig. S1** Zeta potential of CN and Co-MOL dispersed in deionized water.

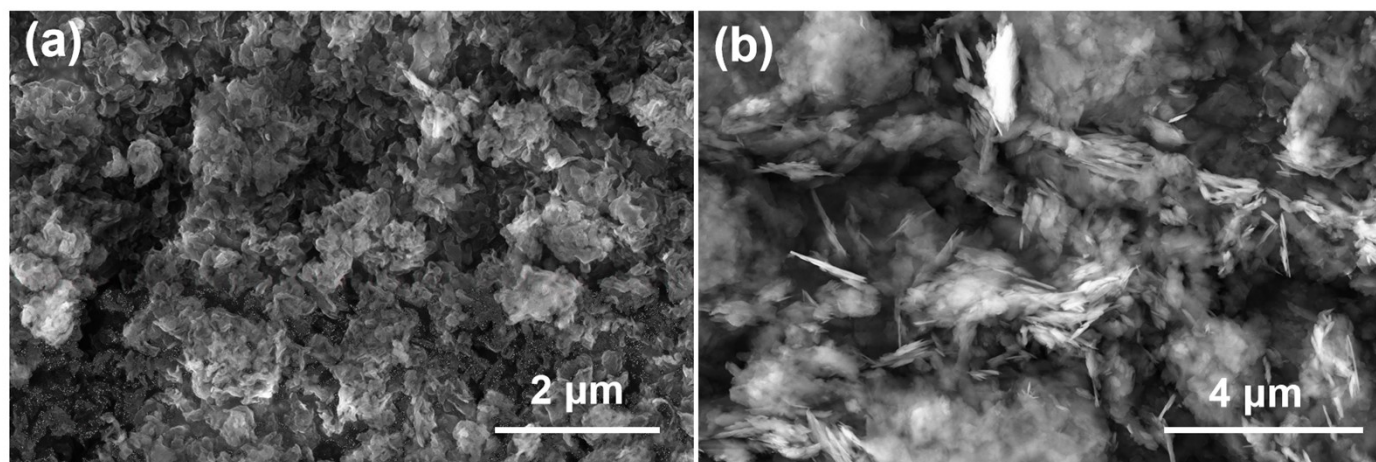

**Fig. S2** HRSEM images of CN (a) and Co-MOL (b).

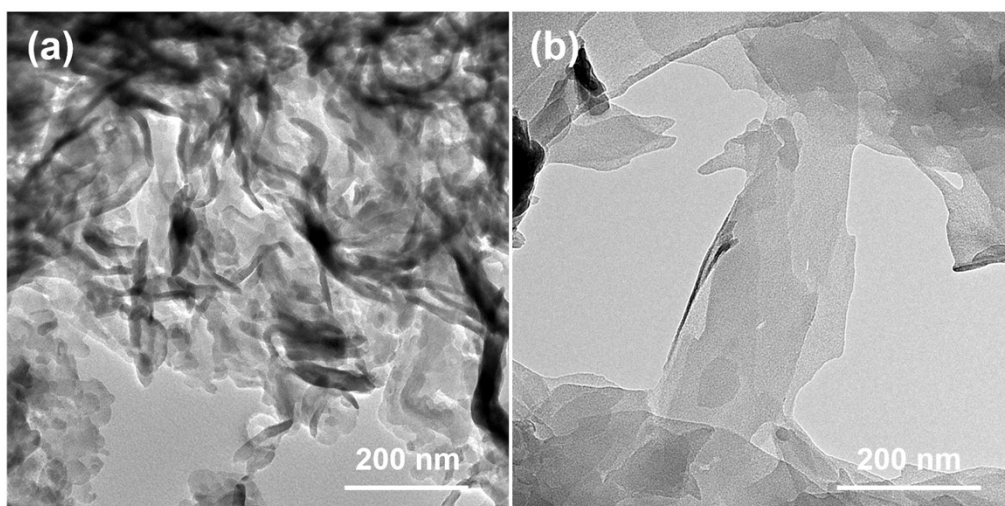

**Fig. S3** TEM images of CN (a) and Co-MOL (b).

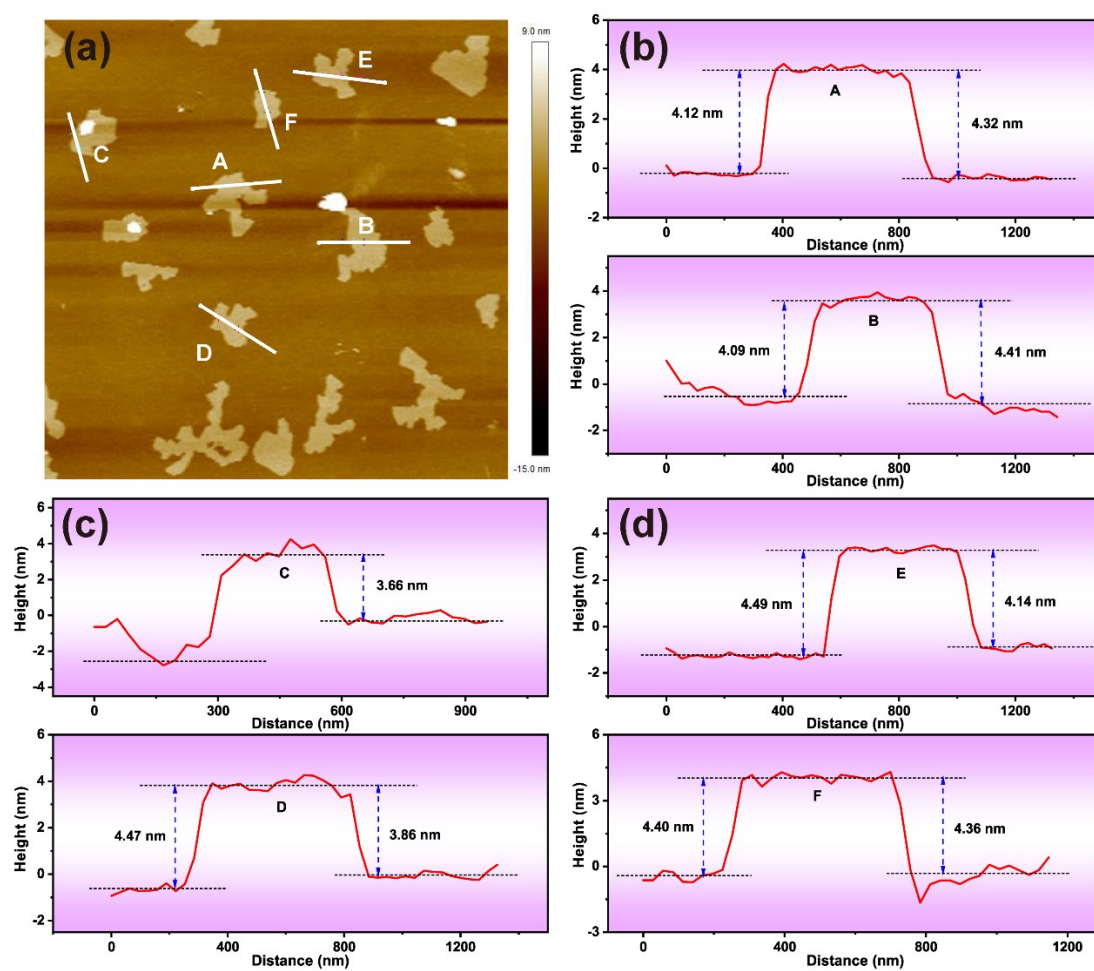

**Fig. S4** (a) AFM images of Co-MOL, and (b-d) the corresponding height profiles.



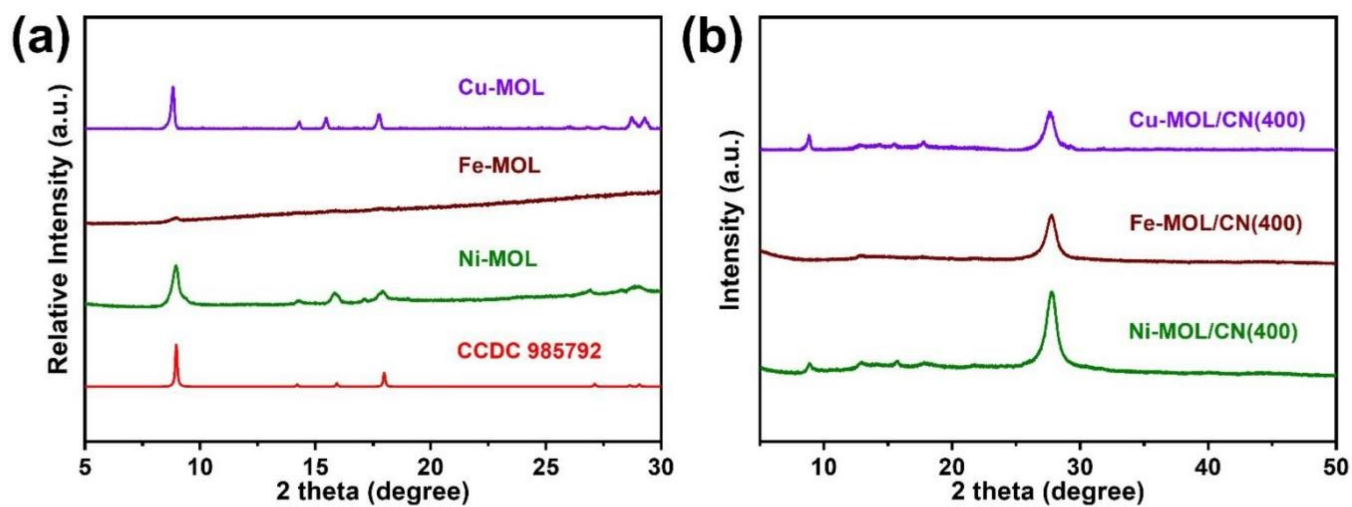

**Fig. S5** (a) XRD patterns for M-MOL (M = Cu, Fe and Ni) and (b) M-MOL/CN(400) (M = Cu, Fe and Ni).

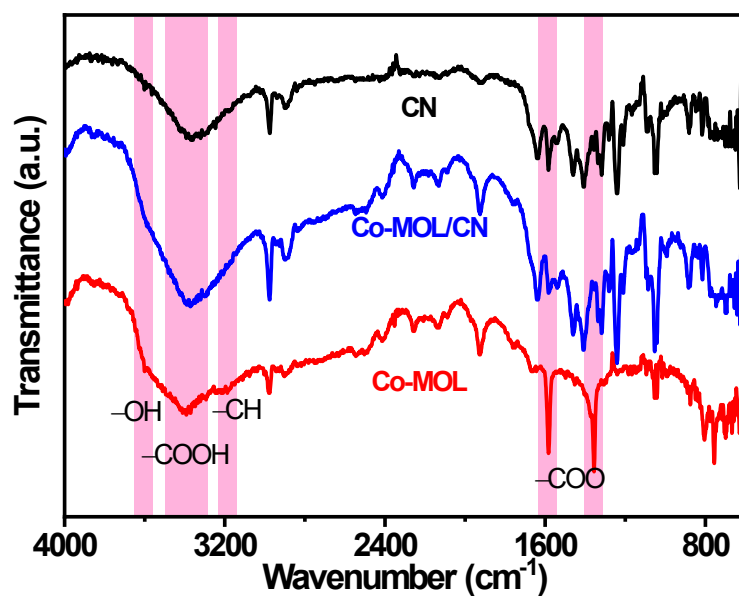

**Fig. S6** FT-IR spectra of Co-MOL (red), CN (black), and Co-MOL/CN(400) (blue).

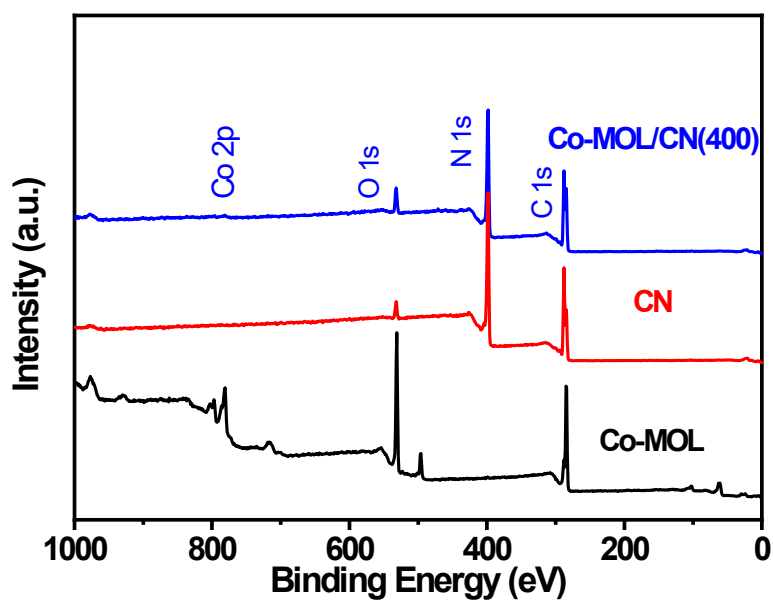

Fig. S7 XPS survey spectrum of the Co-MOL (black), CN (red) , and Co-MOL/CN(400) (blue).

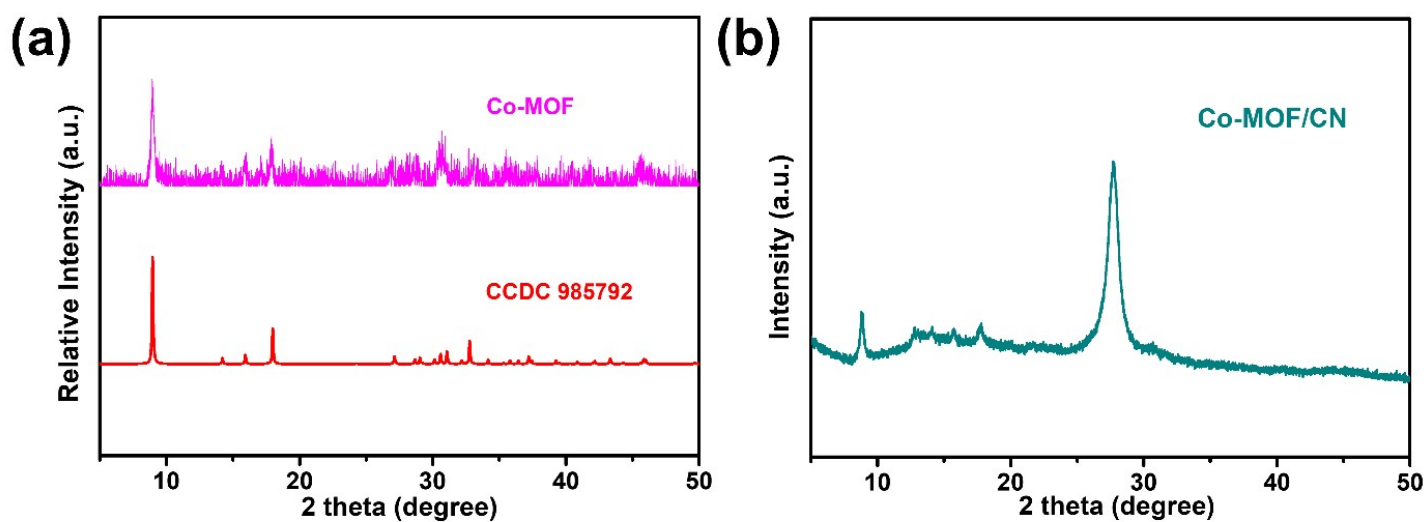

Fig. S8 Powder XRD patterns for (a) MOF and (b) Co-MOF/CN(400).

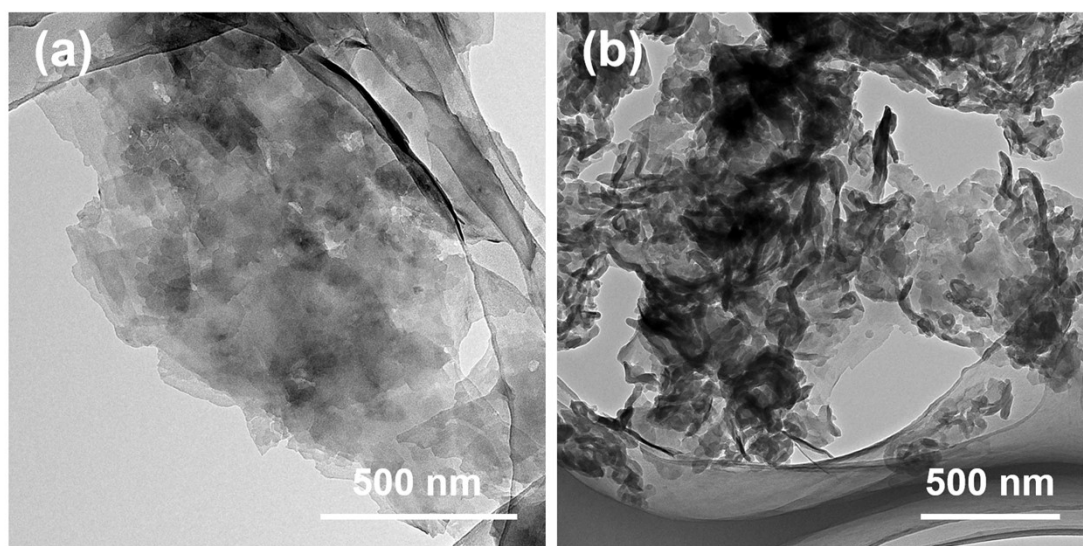

**Fig. S9** (a) TEM images of Co-MOF and (b) Co-MOF/CN.

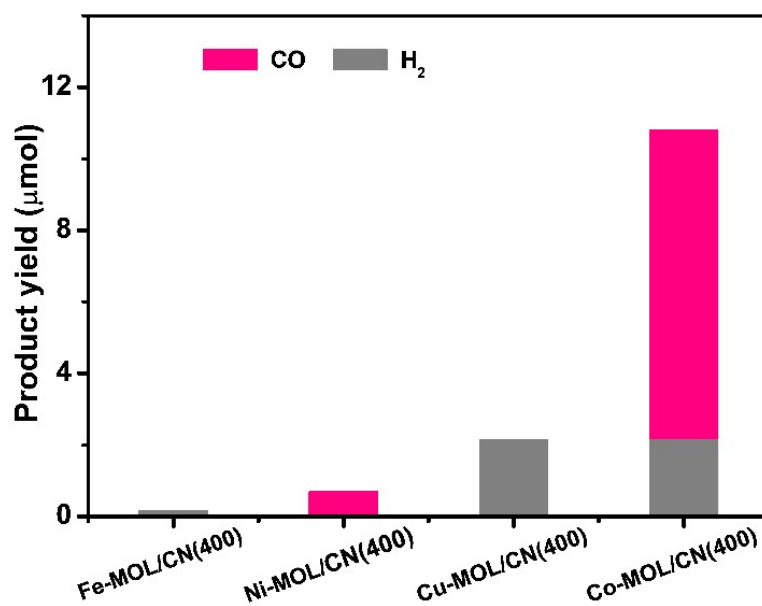

**Fig. S10** CO<sub>2</sub> photoreduction performance for Fe-MOL/CN(400), Ni-MOL/CN(400), and Cu-MOL/CN(400), Co-MOL/CN(400).

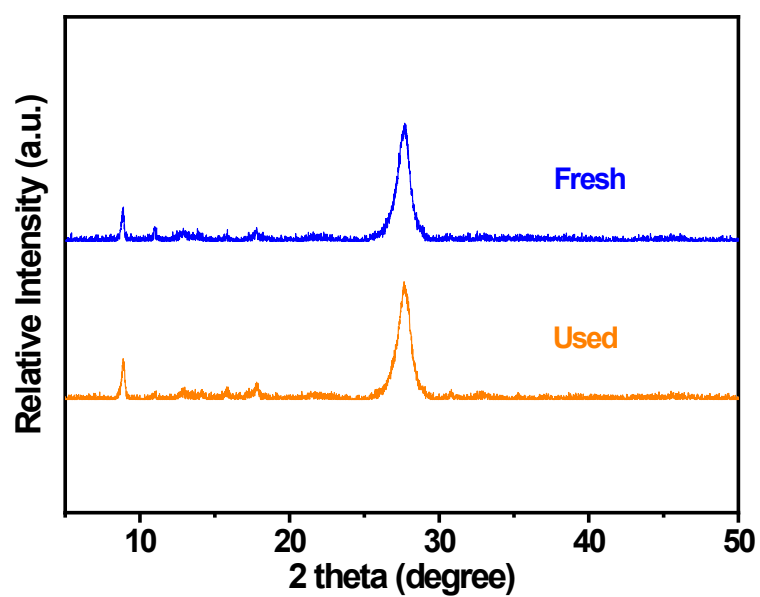

Fig. S11 Powder XRD spectra for fresh and used Co-MOL/CN(400).

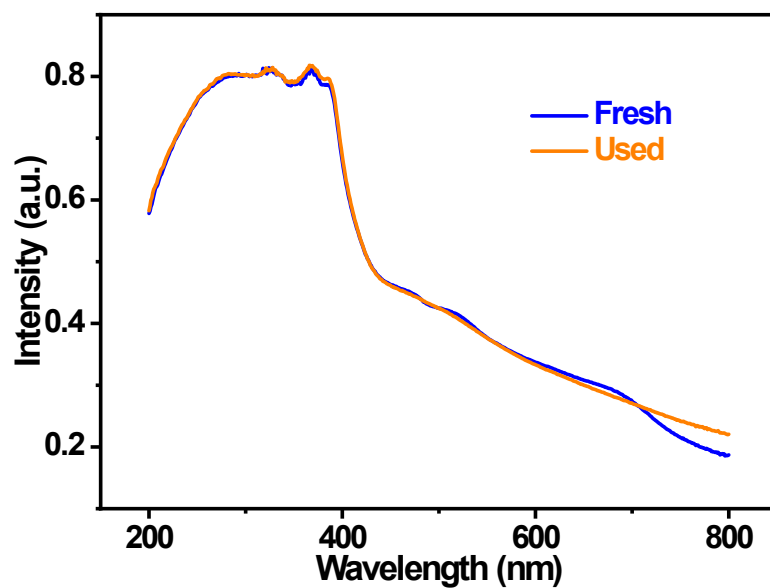

Fig. S12 UV-vis spectra for Co-MOL/CN(400) before and after reaction.

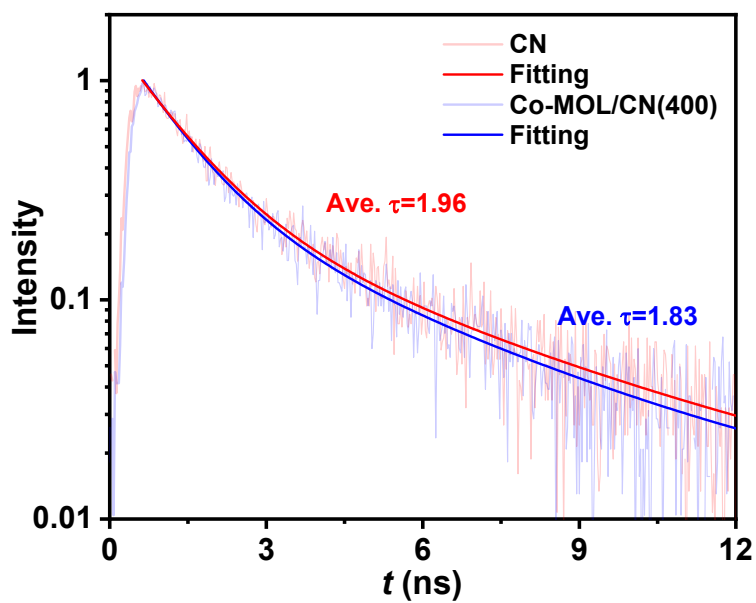

**Fig. S13** PL decay curves of CN and Co-MOL/CN(400) (Excitation wavelength: 380 nm; Detection wavelength: 436 nm).

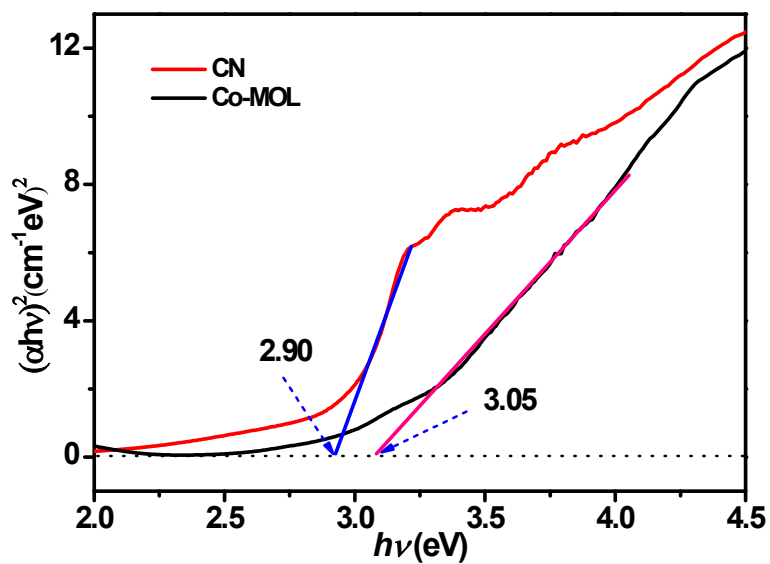

**Fig. S14** The corresponding Tauc plots of  $(\alpha h\nu)^2$  versus  $h\nu$  of CN and Co-MOL.

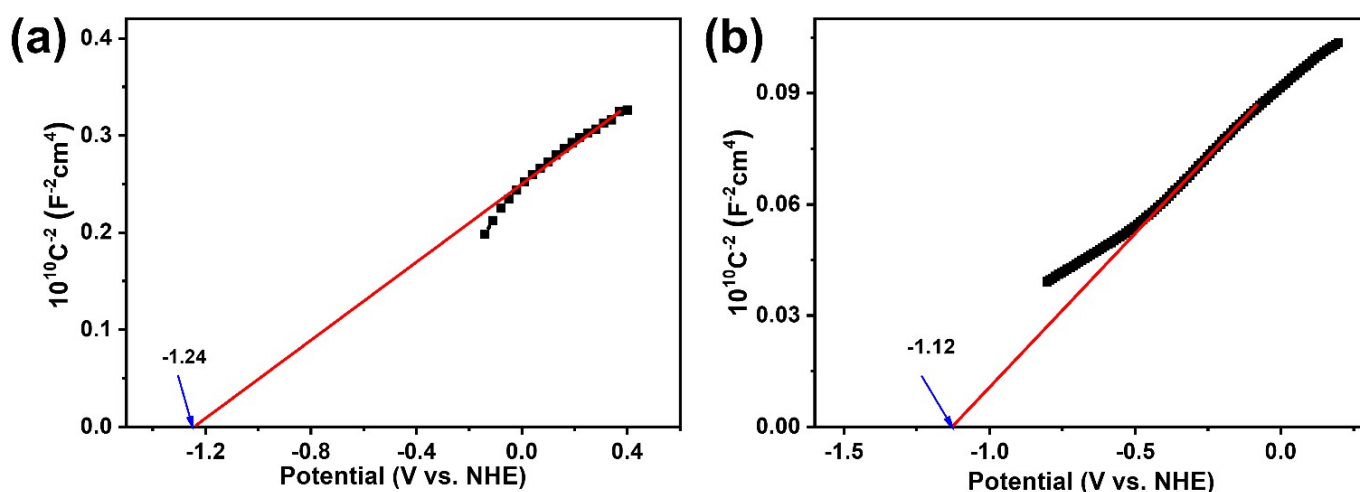

**Fig. S15** Mott-Schottky plots of (a) CN and (b) Co-MOL at frequencies 1.0 kHz.

## Reference

- [1] A. Mesbah, P. Rabu, R.M. Sibille, S. Lebègue, T.M. Mazet, B.N. Malaman, and M. François, From Hydrated  $\text{Ni}_3(\text{OH})_2(\text{C}_8\text{H}_4\text{O}_4)_2(\text{H}_2\text{O})_4$  to Anhydrous  $\text{Ni}_2(\text{OH})_2(\text{C}_8\text{H}_4\text{O}_4)$ : Impact of Structural Transformations on Magnetic Properties, *Inorg. Chem.*, **2014**, 53, 872-881.
- [2] L. Shi, T. Wang, H. Zhang, K. Chang, J. Ye, Electrostatic Self-Assembly of Nanosized Carbon Nitride Nanosheet onto a Zirconium Metal–Organic Framework for Enhanced Photocatalytic  $\text{CO}_2$  Reduction, *Adv. Funct. Mater.*, **2015**, 25, 5360-5367.
- [3] G. Xu, H. Zhang, J. Wei, H.-X. Zhang, X. Wu, Y. Li, C. Li, J. Zhang, J. Ye, Integrating the g- $\text{C}_3\text{N}_4$  Nanosheet with B–H Bonding Decorated Metal–Organic Framework for  $\text{CO}_2$  Activation and Photoreduction, *ACS Nano*, **2018**, 12, 5333-5340.
- [4] Y. Wang, L. Guo, Y. Zeng, H. Guo, S. Wan, M. Ou, S. Zhang, Q. Zhong, Amino-Assisted  $\text{NH}_2\text{-UiO-66}$  Anchored on Porous g- $\text{C}_3\text{N}_4$  for Enhanced Visible-Light-Driven  $\text{CO}_2$  Reduction, *ACS Appl. Mater. Interfaces*, **2019**, 11, 30673-30681. ACS Appl Mater Interfaces
- [5] L. Zhao, Z. Zhao, Y. Li, X. Chu, Z. Li, Y. Qu, L. Bai, L. Jing, The synthesis of interface-modulated ultrathin Ni(ii) MOF/g- $\text{C}_3\text{N}_4$  heterojunctions as efficient photocatalysts for  $\text{CO}_2$  reduction, *Nanoscale*, **2020**, 12, 10010-10018.
- [6] S. Tang, X. Yin, G. Wang, X. Lu, T. Lu, Single titanium-oxide species implanted in 2D g- $\text{C}_3\text{N}_4$  matrix as a highly efficient visible-light  $\text{CO}_2$  reduction photocatalyst, *Nano Res.*, **2019**, 12, 457-462.
- [7] S. Wang, J. Lin, X. Wang, Semiconductor–redox catalysis promoted by metal–organic frameworks for  $\text{CO}_2$  reduction, *Phys. Chem. Chem. Phys.*, **2014**, 16, 14656-14660.
- [8] J.-H. Zhang, W. Yang, M. Zhang, H.-J. Wang, R. Si, D.-C. Zhong, T.-B. Lu, Metal-organic layers as a platform for developing single-atom catalysts for photochemical  $\text{CO}_2$  reduction, *Nano Energy*, **2021**, 80, 105542.
- [9] S. Liu, F. Chen, S. Li, X. Peng, Y. Xiong, Enhanced photocatalytic conversion of greenhouse gas  $\text{CO}_2$  into solar fuels over g- $\text{C}_3\text{N}_4$  nanotubes with decorated transparent ZIF-8 nanoclusters, *Appl. Catal. B*, **2017**, 211, 1-10.
